# Supplementary material
Source: publisher figshare collection journal article supplement (https://acs.figshare.com/ndownloader/files/8248067)
Supplement: Supplementary file 1 [file 8248067]

Supporting Information

# Highly Compressible Nitrogen-doped Carbon Foam Electrode with Excellent Rate Capability via a Smart Etching and Catalytic Process

*Kang Xiao, Yanhua Zeng, Jin Long, Hongbin Chen, Liang-Xin Ding, \* Suqing Wang  
and Haihui Wang\**

School of Chemistry and Chemical Engineering, South China University of  
Technology, Guangzhou 510640, China

*\* corresponding authors: [lxding@scut.edu.cn](mailto:lxding@scut.edu.cn); [hhwang@scut.edu.cn](mailto:hhwang@scut.edu.cn)*

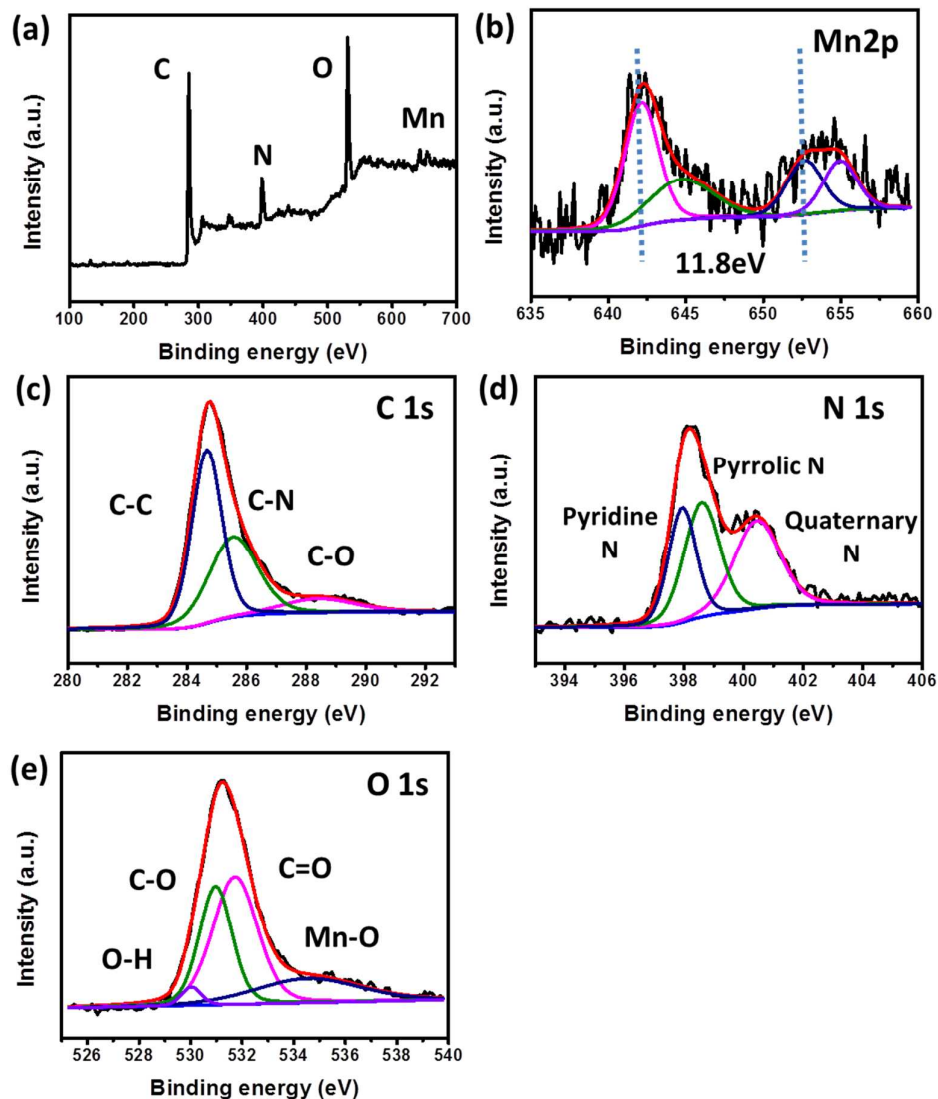

**Figure S1.** The survey XPS spectrum (a) and high-resolution XPS of Mn 2p, (b) C 1s, (c) N 1s (d) and O 1s (e) spectrum of ENCF.

The C1s spectrum of the ENCF can be deconvoluted into three peaks corresponds to the C-C, C-N and C-O, respectively (Fig. S1c). The N1s spectrum was also deconvoluted into three peaks at 398, 398.8, and 400.8 eV, indicating that pyridine N, pyrrolic N and quaternary N are existing in the ENCF (Fig. S1d). In addition, the O1s spectrum can be deconvoluted into four peaks, which are respectively attributed to the O-H, C-O, C=O and Mn-O configurations (Fig. S1e).<sup>1</sup>

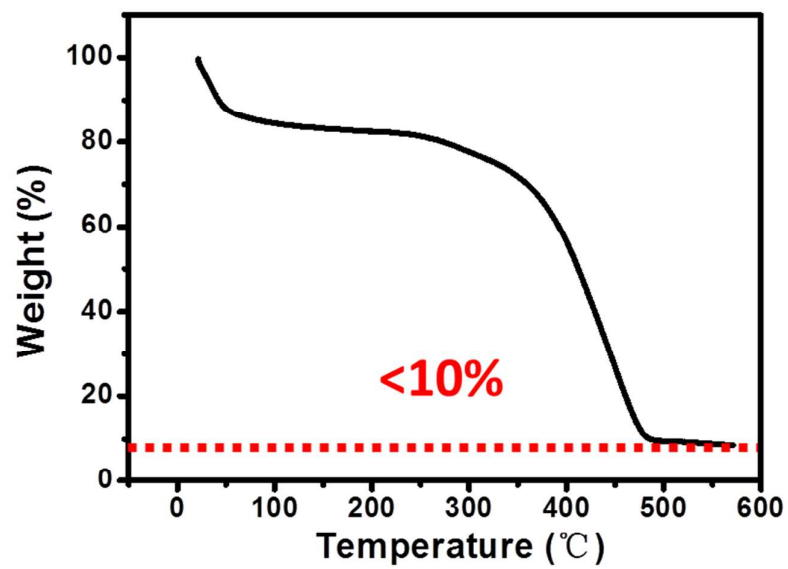

**Figure S2.** Thermogravimetry (TG) curve of ENCF.

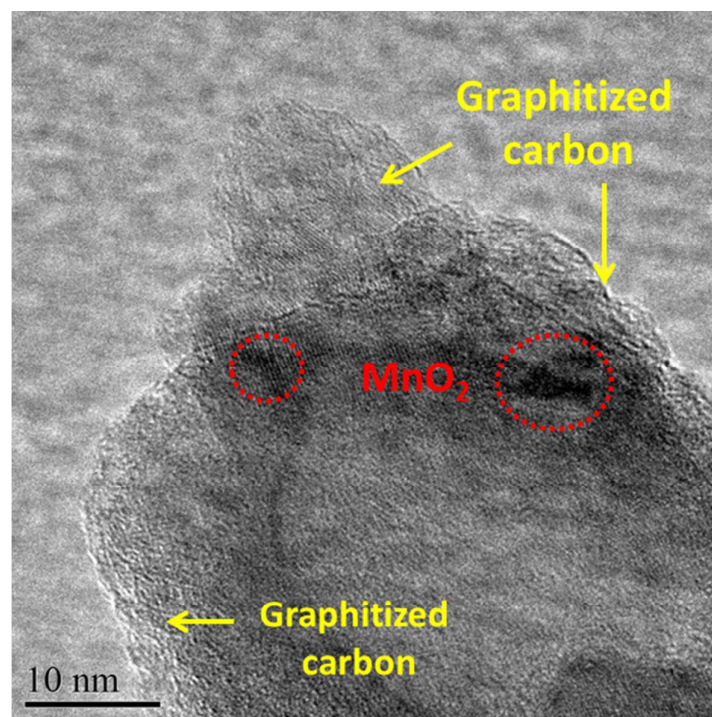

**Figure S3.** HRTEM image of the ENCF.

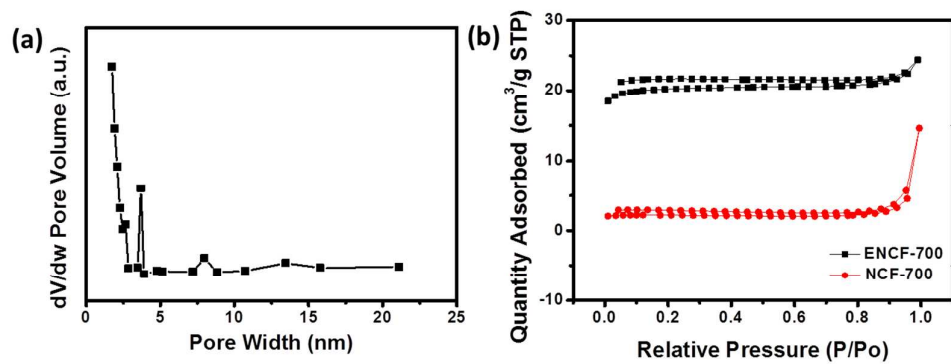

**Figure S4.** (a) Pore-size distribution curve of ENCF. (b) N<sub>2</sub> adsorption/desorption isotherm curves of ENCF and NCF.

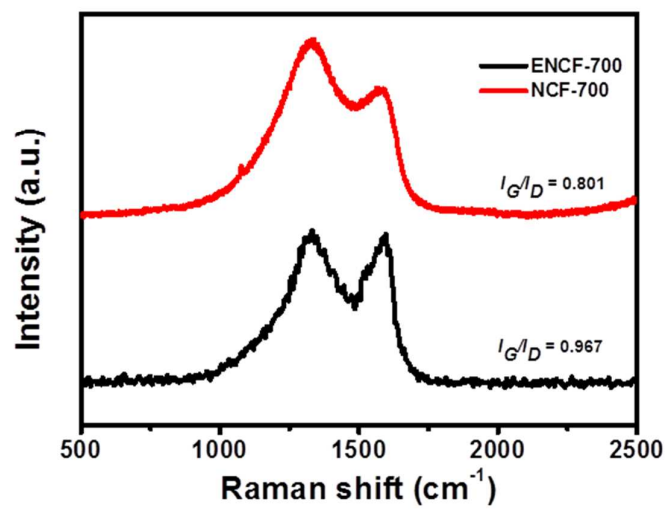

**Figure S5.** Raman spectra of ENCF and NCF.

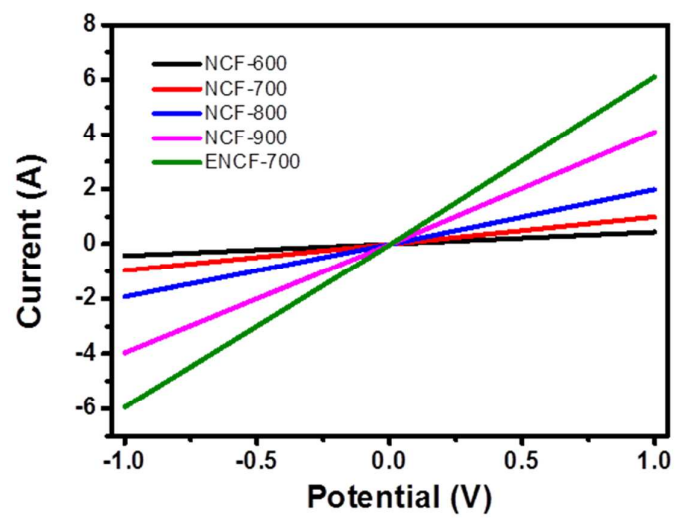

**Figure S6.** *I-V* curves of ENCF and NCF prepared at various temperatures.

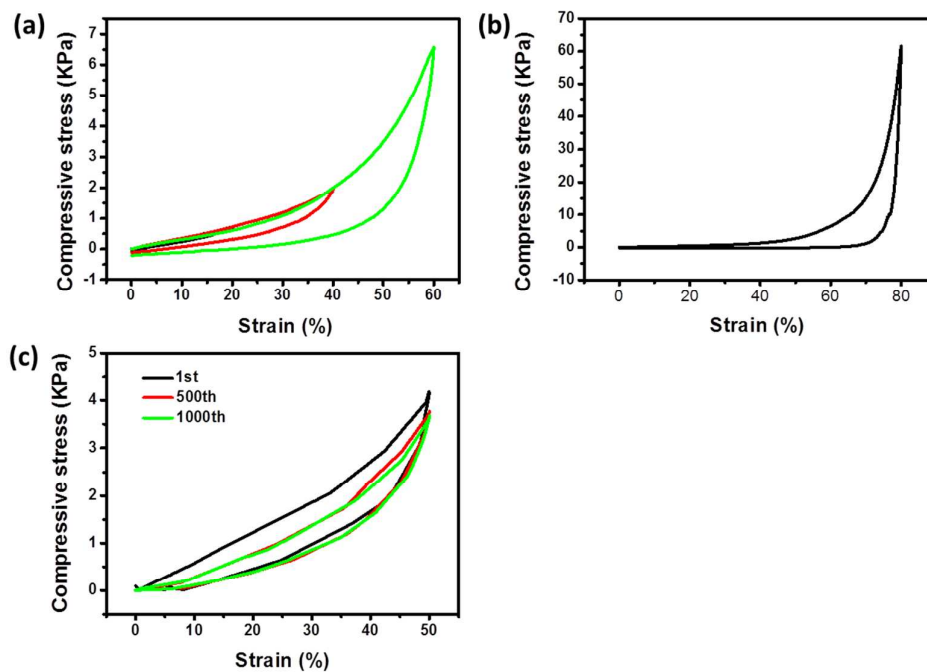

**Figure S7.** (a-b) The stress-strain curves of ENCF at different strain of 20%, 40%, 60%, and 80%, respectively. (c) The stress-strain curves of ENCF at the maximum strain of 50% for 1000 cycles.



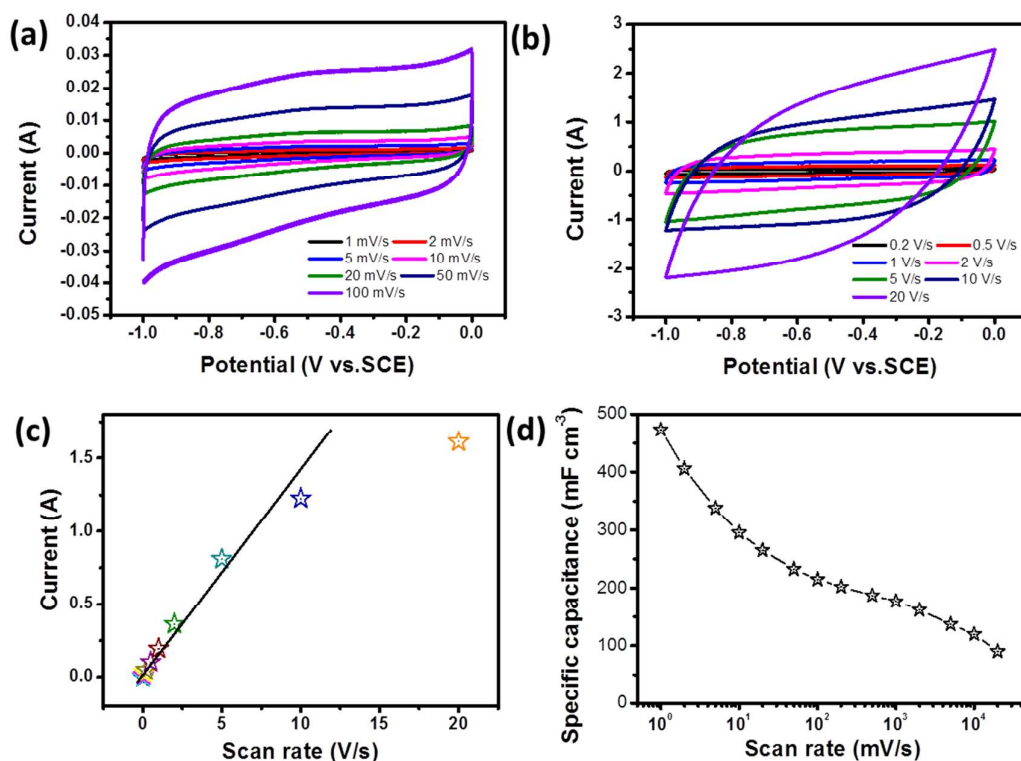

**Figure S8.** (a) CV curves of the ENCF electrode at low scan rates from 1 mV s<sup>-1</sup> to 100 mV s<sup>-1</sup>, and (b) at high scan rates from 0.2 V s<sup>-1</sup> to 20 V s<sup>-1</sup>. (c) A linear dependence of the discharge current versus scan rates. (d) The specific capacitance of ENCF electrode at various scan rates.

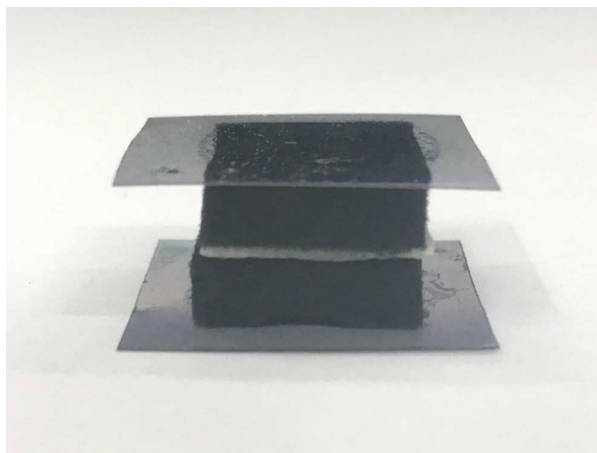

**Figure S9.** A digital photograph of an ENCF-SSC device.

**Table S1.** Specific capacitance of compressible electrode.

| Electrode                    | Capacitance              |                                 | Ref.      |
|------------------------------|--------------------------|---------------------------------|-----------|
|                              | Aqueous electrolyte      | All solid state device (strain) |           |
| Carbon nanotube sponges      | $1.1 \text{ F g}^{-1}$   | No report                       | 2         |
| PPy/Graphene                 | $350 \text{ F g}^{-1}$   | No report                       | 3         |
| Graphene/polypyrrole aerogel | $253 \text{ F g}^{-1}$   | No report                       | 4         |
| N-doped graphene             | $30 \text{ mF cm}^{-2}$  | No report                       | 5         |
| NCF                          | $332 \text{ mF cm}^{-2}$ | $36.4 \text{ mF cm}^{-3}$ (60%) | 6         |
| ENCF                         | $473 \text{ mF cm}^{-3}$ | $56 \text{ mF cm}^{-3}$ (60%)   | This work |

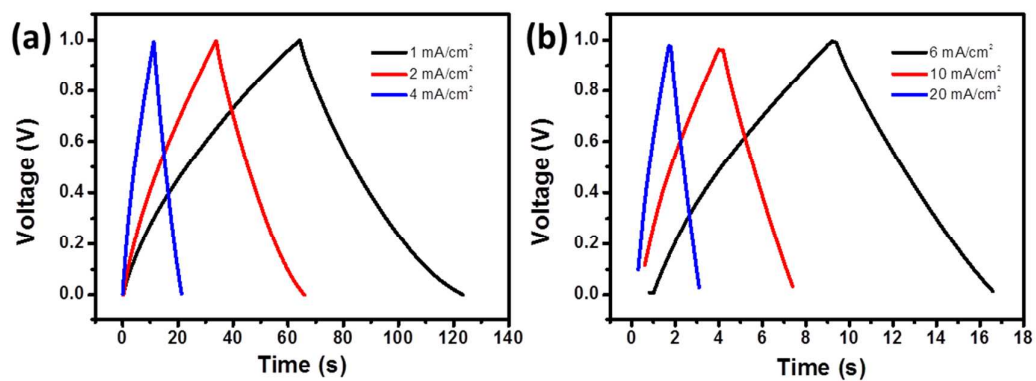

**Figure S10.** (a) GCD curves of the ENCF SSC device at low current density from 1 mA cm<sup>-2</sup> to 4 mA cm<sup>-2</sup>, and (b) at high current density from 6 mA cm<sup>-2</sup> to 20 mA cm<sup>-2</sup>.

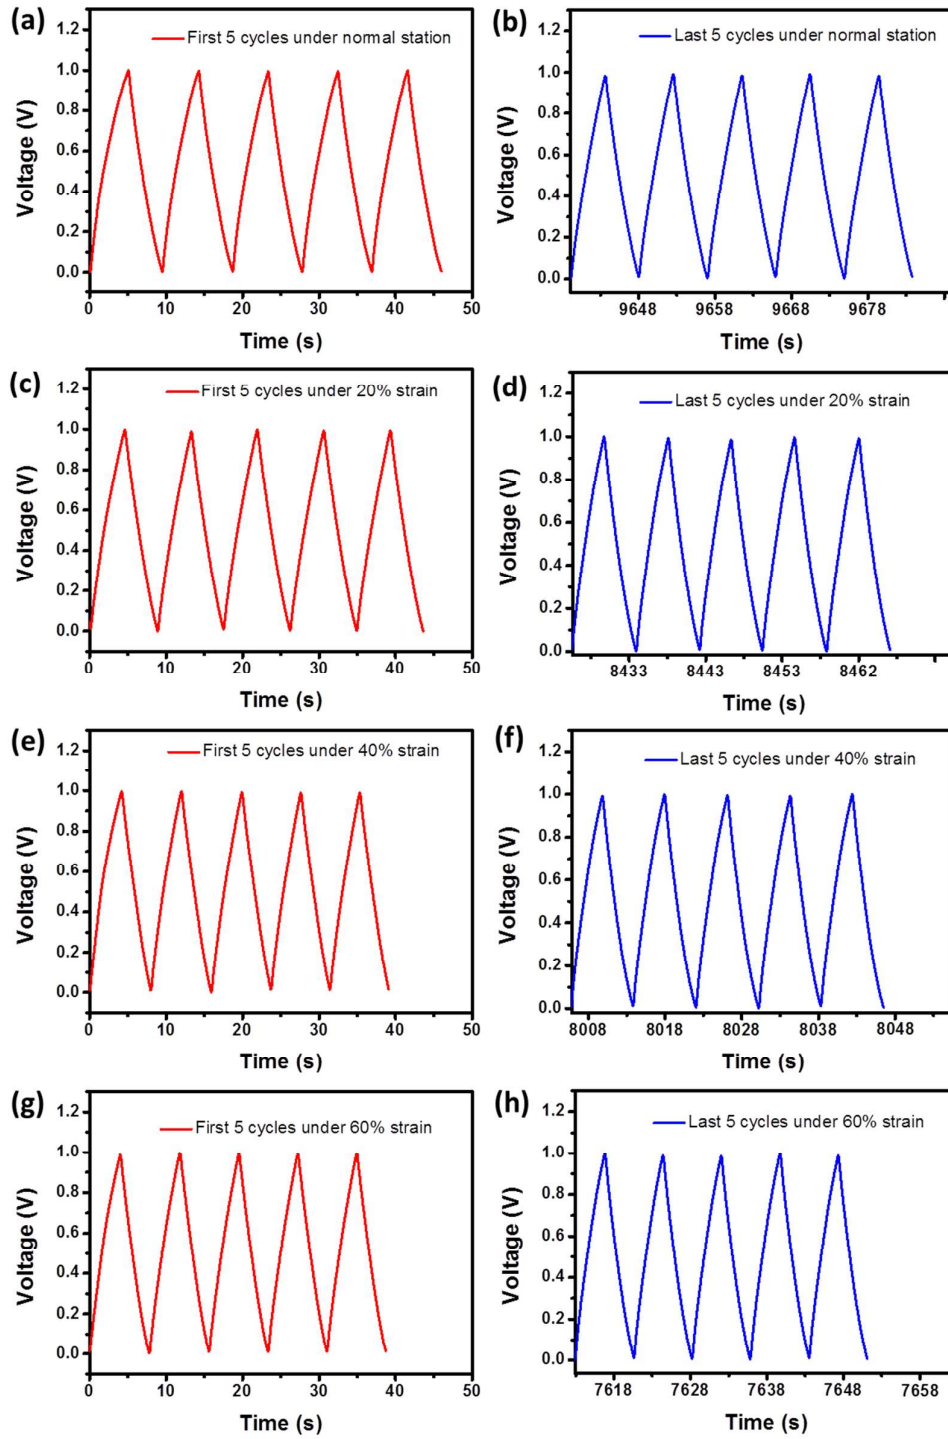

**Figure S11.** The first 5 cycles under different strains, (a) normal station, (c) 20%, (e) 40%, (g) 60% and the last 5 cycles GCD curves of ENCF-SSC device under different strains, (b) normal station, (d) 20%, (f) 40%, (h) 60%.

## Reference

1. Xiao, K.; Ding, L.-X.; Chen, H. B.; Wang, S. Q.; Lu, X. H.; Wang, H. H. Nitrogen-doped Porous Carbon Derived from Residuary Shaddock Peel: A Promising and Sustainable Anode for High Energy Density Asymmetric Supercapacitors. *J. Mater. Chem. A* **2016**, *4*, 372-378.
2. Li, P.; Kong, C.; Shang, Y.; Shi, E.; Yu, Y.; Qian, W.; Wei, F.; Wei, J.; Wang, K.; Zhu, H. Highly Deformation-tolerant Carbon Nanotube Sponges as Supercapacitor Electrodes. *Nanoscale* **2013**, *5*, 8472-8479.
3. Zhao, Y.; Liu, J.; Hu, Y.; Cheng, H.; Hu, C.; Jiang, C.; Jiang, L.; Cao, A.; Qu, L. Highly Compression-tolerant Supercapacitor Based on Polypyrrole-mediated Graphene Foam Electrodes. *Adv. Mater.* **2013**, *25*, 591-595.
4. Ye, S. B.; Feng, J. C. Self-assembled Three-dimensional Hierarchical Graphene/Polypyrrole Nanotube Hybrid Aerogel and Its Application for Supercapacitors. *ACS Appl. Mater. Interfaces* **2014**, *6*, 9671-9679.
5. Qin, Y.; Yuan, J.; Li, J.; Chen, D.; Kong, Y.; Chu, F.; Tao, Y.; Liu, M. Crosslinking Graphene Oxide into Robust 3D Porous N-doped Graphene. *Adv. Mater.* **2015**, *27*, 5171-5175.
6. Xiao, K.; Ding, L. X.; Liu, G.; Chen, H.; Wang, S.; Wang, H. Freestanding, Hydrophilic Nitrogen-doped Carbon Foams for Highly Compressible All Solid-State Supercapacitors. *Adv. Mater.* **2016**, *28*, 5997-6002.
